# Supplementary material for: Extracellular microRNA 130b‐3p inhibits eCIRP‐induced inflammation
Source: PubMed Central journal article supplement (PMC10563445; doi:10.15252/embr.201948075), 2019-11-14
Supplement: EMBR-21-e48075-s007.pdf [file EMBR-21-e48075-s007.pdf]

## **Extracellular microRNA 130b-3p inhibits eCIRP-induced inflammation**

Steven D. Gurien, Monowar Aziz, Hui Jin, Haichao Wang, Mingzhu He, Yousef Al-Abed, Jeffrey M. Nicastro, Gene F. Coppa, Ping Wang

---

### **Review timeline:**

|                     |               |
|---------------------|---------------|
| Submission date:    | 12th Mar 2019 |
| Editorial Decision: | 18th Mar 2019 |
| Revision received:  | 19th Apr 2019 |
| Editorial Decision: | 15th May 2019 |
| Revision received:  | 14th Aug 2019 |
| Editorial Decision: | 19th Sep 2019 |
| Revision received:  | 27th Sep 2019 |
| Editorial Decision: | 6th Oct 2019  |
| Revision received:  | 18th Oct 2019 |
| Accepted:           | 24th Oct 2019 |

---

Editor: Achim Breiling

### **Transaction Report:**

No Peer Review Process File is available with this article, as the authors have chosen not to make the review process public.
